# Supplementary material
Source: PubMed Central journal article supplement (PMC4201637)
Supplement: NIHMS610291-supplement-Supp_data.pdf [file NIHMS610291-supplement-Supp_data.pdf]

## **Radiochemistry**

The purified  $^{11}\text{C}$ -(+)-PHNO product was formulated in 1 mL of USP absolute ethanol and 10 mL of USP sterile saline, and 0.04 mL of 4.2% sodium bicarbonate. Filtration of the ethanolic saline solution through a 0.22  $\mu\text{m}$  Millipore membrane filter produced sterile, apyrogenic  $^{11}\text{C}$ -(+)-PHNO solution ready for intravenous administration.

## **Arterial Input Function Measurement**

*Whole blood and plasma.* Both continuous and sequential discrete arterial blood samples were taken as previously described (1) with modifications: sample volumes ranged from 2 to 10 mL; the function used to fit the whole-blood-over-plasma ratio was a sum of two exponentials.

*Determination of ligand metabolism in plasma.* In order to measure the ligand metabolism in plasma, six plasma samples (3, 7, 15, 30, 60 and 90 min postinjection; 2 to 10 mL) were mixed with urea at a final concentration of 8 M and 16 mg of citric acid, and filtered through a Millipore syringe filter (0.45  $\mu\text{m}$ ). The filtrate was then analyzed by reverse-phase HPLC using a column-switching system (2). Up to 5 mL of filtrate was loaded on the HPLC system (Shimadzu, Kyoto, Japan), and a mobile phase of 1% acetonitrile water was eluted through the self-packed capture column with solid phase extraction C18 sorbent (Strata-X, Phenomenex, Torrance, CA, USA) at a flow rate 2 mL/min. Then the content of the capture column was back-flushed onto a Phenomenex Luna C18 analytical column (250x4.6mm, 5  $\mu\text{m}$ ) (Phenomenex, Torrance, CA, USA), with a mobile phase consisting of 77:23 0.1M ammonium formate pH6.4: acetonitrile at a flow rate of 1.4 mL/min for the analytical column. The output of the HPLC column was connected to a fraction collector (CF-1 Fraction Collector, Spectrum Chromatography, Houston, TX, USA). Fractions were collected every two minutes and counted in a cross-calibrated well counter.

The ratio of the radioactivity concentrations in filtrate and plasma was obtained and fitted to an exponential rise to plateau curve ( $f_F(t) = a - be^{-\alpha t}$ ). The unchanged fraction in the filtrate from HPLC was fitted to a bounded sum of exponentials ( $f_H(t) = \min(1, A_1e^{-\alpha_1 t} + A_2e^{-\alpha_2 t})$ ). The unchanged fraction in plasma was then computed as the product of the functions  $f_F$  and  $f_H$ . Finally, the arterial input function was computed as the product of the plasma radioactivity concentration and the unchanged fraction.

*Plasma free fraction.* The plasma free fraction ( $f_p$ ) of  $^{11}\text{C}$ -(+)-PHNO was measured by ultrafiltration as previously described (1).

### **PET Data Acquisition, Image Reconstruction and Motion Correction**

During the PET scans, subjects wore a swim cap to which a rigid optical tracking tool was attached to record head motion with an infrared detector (Vicra, NDI Systems, Waterloo, Ontario, Canada). A 6-min transmission scan was acquired after starting recording head motion with the infrared detector and just before  $^{11}\text{C}$ -(+)-PHNO injection, for both test and retest scans. List mode data were acquired for 120 minutes following  $^{11}\text{C}$ -(+)-PHNO injection. Dynamic list mode data were reconstructed with all corrections (attenuation, normalization, scatter, randoms, deadtime and motion) using the MOLAR algorithm (3) with the following frame timing: 6 x 30 sec; 3 x 1 min; 2 x 2 min; 22 x 5 min. A second step of motion correction was also performed, consisting of image smoothing (Gaussian filter with a full width at half maximum (FWHM) of 3 pixels) followed by coregistration to an early summed image (0-10 min post-injection) using a 6-parameter mutual information algorithm (FLIRT, FSL 3.2, Analysis Group, FMRIB, Oxford, UK). The registration of early reference and each frame's image data was weighted using a head mask based on the transmission image and Vicra motion correction data, i.e. the head mask was resliced according to the Vicra motion data, and a weight image was computed for each frame (and for the 0-10 reference period) as the average of all corresponding resliced masks.

## Magnetic Resonance Imaging

MR imaging was performed on a 3T Trio (Siemens Medical Systems, Erlangen, Germany) with a circularly-polarized head coil. MR acquisition was a Sag 3D magnetization-prepared rapid gradient-echo (MPRAGE) sequence with 3.34 ms echo time, 2,500 ms repetition time, 1,100 ms inversion time, 7 degree flip angle, and 180 Hz/pixel bandwidth. The image dimensions were 256 x 256 x 176 and pixel size was 0.98 x 0.98 x 1.0 mm.

## Regional TAC Computation

Gray matter regions-of-interest (ROIs) were taken from the Anatomical Automatic Labeling (AAL) template (4) delineated on a MR template (5). Six ROIs were selected: cerebellum (84 cm<sup>3</sup> in template space), caudate (16 cm<sup>3</sup>), putamen (17 cm<sup>3</sup>), pallidum (4.6 cm<sup>3</sup>), amygdala (3.7 cm<sup>3</sup>), and thalamus (17 cm<sup>3</sup>). Extra ROIs corresponding to the hypothalamus (1.4 cm<sup>3</sup>) and ventral striatum (2.2 cm<sup>3</sup>) were also drawn on the template MRI. The ventral striatum was drawn similarly to a previous study (6). Finally, a SN template ROI (1.0 cm<sup>3</sup>) was also created: individual SN ROIs were drawn on each PET scan on SRTM2 binding potential ( $BP_{ND}$ ) images. ROIs were drawn as a series of ellipsoids on 6-7 coronal slices with a target volume of 1 cm<sup>3</sup> (bilaterally); then a template ROI was created from these individual ROIs by transferring them to template space, creating a probability map by averaging these transferred ROIs, and finally selecting voxels with the highest probability, with a cut-off determined to achieve the desired 1-mL volume.

To apply the ROIs to the PET data, two transformations were estimated. First, a nonlinear transformation grid was estimated between the template MR image and each subject's MR image, using the Bioimagesuite software (version 2.5; <http://www.bioimagesuite.com>). This nonlinear coregistration algorithm is based on the method proposed by (7) with modifications (8). Then, a summed image (0-10 min postinjection) was created from the motion-corrected PET dynamic

images and registered to the subject's MR image, using a 6-parameter rigid registration estimated with a mutual information algorithm (FLIRT, FSL 3.2, Analysis Group, FMRIB, Oxford, UK).

A similar approach to delineate ROIs (using the AAL template and coregistrations between the template and subject MRIs, and between the subjects' PET and MR images) was used previously in test-retest studies (9-11), with different software.

### **Parameter Estimation**

Parameters were estimated using weighted least squares, with weights based on the noise-equivalent counts in each frame using custom software for IDL 8.0 (ITT Visual Information Solutions, Boulder, CO, USA), as previously described (1).

### **Effect of Scan Duration**

The scan duration in this study was 120 min. When only 90-min of data were analyzed,  $V_T$  and  $BP_{ND}$  estimates were slightly lower for all methods, especially in high  $BP_{ND}$  ROIs: e.g., the regression line between 120-min and 90-min  $V_T$  estimates (MA1) was  $y = 0.91x + 0.07$ , with  $r^2=0.962$ . With only 90-min of data, the agreement between MA1 and SRTM or SRTM2  $BP_{ND}$  estimates was improved: e.g., the regression equation between MA1 and regional averages of SRTM  $BP_{ND}$  images was  $y = 1.03x - 0.004$ , with  $r^2=0.947$  (versus  $y = 0.89x + 0.22$ ,  $r^2=0.952$ , with 120-min data). Finally, the difference in  $\sigma(\Delta BP_{ND})$  between 90-min and 120-min scans was less than 1 percentage point in caudate, putamen, ventral striatum and thalamus, but  $\sigma(\Delta BP_{ND})$  was 3, 5 and 8 percentage points higher in the pallidum, amygdala and SN, respectively, with only 90-min data. The only ROI with lower  $\sigma(\Delta BP_{ND})$  (by 4 percentage points) with 90-min data was the hypothalamus. Therefore on the HRRT scanner, 120-min scans are preferable, but only for applications targeting D3-receptors.

## Comparison of various volumes of distribution and binding potentials

Normalizing  $V_T$  by  $f_p$  did not change TRV: both  $m(\Delta V_T)$  and  $m(\Delta V_T/f_p)$  ranged between -9% and +2%, and  $\sigma(\Delta V_T)$  ranged from 13% to 25% while  $\sigma(\Delta V_T/f_p)$  ranged from 13% to 24% (Table S1). Therefore, based on this study,  $V_T$  and  $V_T/f_p$  can be used interchangeably, but measuring  $f_p$  is recommended for studies in which  $V_T$  will be compared across different populations or during pharmacological challenges where  $f_p$  might be affected.

The binding potentials,  $BP_{ND}$ ,  $BP_p$  and  $BP_F$ , computed from MA1  $V_T$  estimates are listed in Table S2. The binding potential with the lowest variability was  $BP_{ND}$ , with  $\sigma(\Delta BP_{ND})$  ranging from 10% to 29%, and  $m(|\Delta BP_{ND}|)$  ranging from 6% to 25%. The variability of  $BP_p$  and  $BP_F$  was ~22% and ~13% higher, respectively, than that of  $BP_{ND}$  (based on  $\sigma(\Delta p)$ ). This lower variability of  $BP_{ND}$  compared to  $BP_p$  and  $BP_F$  was also seen for  $^{11}\text{C}$ -raclopride (6) and  $^{11}\text{C}$ -NPA (12).

**Table S1:** Volumes of distributions estimated with MA1 fits of regional TACs.

|              | $V_T$         |                      |                  | $V_T/f_p$      |                          |                  |
|--------------|---------------|----------------------|------------------|----------------|--------------------------|------------------|
|              | Average*      | $\Delta V_T^\dagger$ | ICC‡             | Average*       | $\Delta V_T/f_p^\dagger$ | ICC‡             |
| Cerebellum   | 4.7±0.7(14%)  | 2%±18%(12%)          | 0.28[-0.44;0.79] | 10.7±1.5(14%)  | 2%±18%(12%)              | 0.06[-0.60;0.69] |
| Caudate      | 13.2±1.8(14%) | 0%±15%(11%)          | 0.81[0.35;0.96]  | 30.1±3.6(12%)  | 0%±15%(11%)              | 0.76[0.23;0.94]  |
| Putamen      | 15.8±1.9(12%) | -1%±13%(9%)          | 0.72[0.16;0.94]  | 35.9±4.2(12%)  | -1%±13%(9%)              | 0.59[-0.08;0.90] |
| Pallidum     | 20.1±3.2(16%) | -2%±14%(9%)          | 0.88[0.54;0.97]  | 45.9±7.2(16%)  | -2%±14%(9%)              | 0.84[0.43;0.96]  |
| V. Striatum  | 22.2±4.9(22%) | 0±21%(15%)           | 0.64[0.01;0.92]  | 50.6±10.8(21%) | 1±19%(15%)               | 0.60[-0.06;0.90] |
| Amygdala     | 5.9±0.8(14%)  | -1±15%(10%)          | 0.51[-0.19;0.88] | 13.5±1.6(12%)  | 0±13%10%                 | 0.39[-0.33;0.84] |
| Sub. Nigra   | 13.4±2.6(19%) | -9%±25%(21%)         | 0.85[0.45;0.97]  | 30.5±5.8(19%)  | -9%±24%(20%)             | 0.86[0.50;0.97]  |
| Thalamus     | 6.4±1.2(18%)  | 2%±17%(13%)          | 0.55[-0.13;0.89] | 14.6±2.5(17%)  | 2%±17%(13%)              | 0.51[-0.19;0.88] |
| Hypothalamus | 12.4±2.7(22%) | -3%±14%(11%)         | 0.80[0.32;0.95]  | 28.2±5.5(19%)  | -3%±15%(13%)             | 0.71[0.13;0.93]  |

\*n=5 healthy controls; data are presented as mean±sd (relative sd) across subjects.

†n=8 subjects; data are presented as  $m(\Delta p) \pm \sigma(\Delta p)$  ( $m(|\Delta p|)$ ), where  $p$  is  $V_T$  or  $V_T/f_p$ .

‡n=8 subjects; ICC is presented as estimate [lower bound; upper bound] of 95% confidence interval

**Table S2:** Binding potential estimates for MA1 fits of regional TACs.

|              | $BP_{ND}$      |                          |                  | $BP_P$        |                       |                  | $BP_F$        |                       |                  |
|--------------|----------------|--------------------------|------------------|---------------|-----------------------|------------------|---------------|-----------------------|------------------|
|              | Average*       | $\Delta BP_{ND}^\dagger$ | ICC <sup>‡</sup> | Average*      | $\Delta BP_P^\dagger$ | ICC <sup>‡</sup> | Average*      | $\Delta BP_F^\dagger$ | ICC <sup>‡</sup> |
| Caudate      | 1.8±0.2(9%)    | -2%±10%(9%)              | 0.92[0.69;0.98]  | 8.5±1.2(14%)  | 0%±14%(11%)           | 0.89[0.59;0.98]  | 19.4±2.3(12%) | 0%±12%(10%)           | 0.91[0.64;0.98]  |
| Putamen      | 2.4±0.2(8%)    | -4%±11%(9%)              | 0.57[-0.11;0.89] | 11.1±1.3(12%) | -2%±11%(9%)           | 0.80[0.34;0.96]  | 25.2±2.8(11%) | -1%±10%(8%)           | 0.76[0.25;0.95]  |
| Pallidum     | 3.3±0.6(17%)   | -6%±11%(6%)              | 0.87[0.51;0.97]  | 15.4±2.9(18%) | -4%±14%(8%)           | 0.91[0.65;0.98]  | 35.2±6.4(18%) | -3%±15%(10%)          | 0.88[0.56;0.97]  |
| V. Striatum  | 3.7±0.6(15%)   | -2±12%(10%)              | 0.82[0.38;0.96]  | 17.5±4.3(25%) | 0%±22%(17%)           | 0.69[0.09;0.93]  | 39.9±9.5(24%) | 1%±20%(16%)           | 0.68[0.07;0.92]  |
| Amygdala     | 0.26±0.07(26%) | -13±29%(25%)             | 0.29[-0.42;0.80] | 1.2±0.3(28%)  | 11%±21%(17%)          | 0.57[-0.11;0.89] | 2.8±0.6(23%)  | -10%±17%(14%)         | 0.63[-0.02;0.91] |
| Sub. Nigra   | 1.8±0.4(19%)   | -16%±17%(19%)            | 0.92[0.68;0.98]  | 8.7±2.2(25%)  | 14%±28%(24%)          | 0.86[0.51;0.97]  | 19.7±4.8(24%) | -14%±28%(23%)         | 0.88[0.55;0.97]  |
| Thalamus     | 0.36±0.10(28%) | 2%±19%(14%)              | 0.73[0.17;0.94]  | 1.7±0.6(36%)  | 4%±21%(16%)           | 0.78[0.29;0.95]  | 3.9±1.3(34%)  | -5%±17%(14%)          | 0.82[0.39;0.96]  |
| Hypothalamus | 1.7±0.8(48%)   | -7%±27%(21%)             | 0.55[-0.14;0.89] | 7.7±2.9(38%)  | -5%±21%(18%)          | 0.80[0.34;0.96]  | 17.5±6.3(36%) | -5%±22%(20%)          | 0.76[0.23;0.94]  |

\*n=5 healthy controls; data are presented as mean±sd (relative sd) across subjects.

†n=8 subjects; data are presented as  $m(\Delta BP_X) \pm \sigma(\Delta BP_X)$  ( $m(|\Delta BP_X|)$ ), where X stands for ND, P, or F.

‡n=8 subjects; ICC is presented as estimate [lower bound; upper bound] of 95% confidence interval

## Variability of SRTM2 and SRTM2 Parametric Images

**Table S3:** Variability of SRTM and SRTM2 parametric images.

|              | $\sigma(\Delta R_1)^*$ |       | $\sigma(\Delta BP_{ND})^*$ |       |
|--------------|------------------------|-------|----------------------------|-------|
|              | SRTM                   | SRTM2 | SRTM                       | SRTM2 |
| Caudate      | 25%                    | 14%   | 34%                        | 22%   |
| Putamen      | 27%                    | 16%   | 40%                        | 28%   |
| Pallidum     | 23%                    | 15%   | 47%                        | 28%   |
| V. Striatum  | 22%                    | 15%   | 39%                        | 28%   |
| Amygdala     | 37%                    | 23%   | 155%                       | 86%   |
| Sub. Nigra   | 20%                    | 18%   | 46%                        | 38%   |
| Thalamus     | 31%                    | 19%   | 83%                        | 48%   |
| Hypothalamus | 23%                    | 20%   | 44%                        | 45%   |

\*Parametric images of  $\sigma(\Delta R_1)$  and  $\sigma(\Delta BP_{ND})$  were computed in template space (n=8 subjects), and the median value in each ROI is reported.

## References:

1. Gallezot J-D, Nabulsi N, Neumeister A, et al. Kinetic modeling of the serotonin 5-HT(1B) receptor radioligand [(11)C]P943 in humans. *J Cereb Blood Flow Metab.* 2010;30:196-210.
2. Hilton J, Yokoi F, Dannals RF, Ravert HT, Szabo Z, Wong DF. Column-switching HPLC for the analysis of plasma in PET imaging studies. *Nucl Med Biol.* 2000;27:627-630.
3. Carson RE, Barker W, Liow J-S, Johnson C. Design of a motion-compensation OSEM list-mode algorithm for resolution-recovery reconstruction for the HRRT. *Nuclear Science Symposium Conference Record, 2003 IEEE.* 2003;5:3281-3285.
4. Tzourio-Mazoyer N, Landeau B, Papathanassiou D, et al. Automated anatomical labeling of activations in SPM using a macroscopic anatomical parcellation of the MNI MRI single-subject brain. *Neuroimage.* 2002;15:273-289.
5. Collins DL, Zijdenbos AP, Kollokian V, et al. Design and construction of a realistic digital brain phantom. *IEEE Trans Med Imaging.* 1998;17:463-468.
6. Mawlawi O, Martinez D, Slifstein M, et al. Imaging human mesolimbic dopamine transmission with positron emission tomography: I. Accuracy and precision of D(2) receptor parameter measurements in ventral striatum. *J Cereb Blood Flow Metab.* 2001;21:1034-1057.



7. Rueckert D, Sonoda LI, Hayes C, Hill DLG, Leach MO, Hawkes DJ. Nonrigid registration using free-form deformations: application to breast MR images. *Medical Imaging, IEEE Transactions on*. 1999;18:712-721.
8. Papademetris X, Jackowski AP, Schultz RT, Staib LH, Duncan JS. Integrated Intensity and Point-Feature Nonrigid Registration. *Medical image computing and computer-assisted intervention : MICCAI International Conference on Medical Image Computing and Computer-Assisted Intervention*. 2001;3216:763-770.
9. Lohith TG, Zoghbi SS, Morse CL, et al. Retest imaging of [(11)C]NOP-1A binding to nociceptin/orphanin FQ peptide (NOP) receptors in the brain of healthy humans. *Neuroimage*. 2013.
10. Lohith TG, Zoghbi SS, Morse CL, et al. Brain and whole-body imaging of nociceptin/orphanin FQ peptide receptor in humans using the PET ligand 11C-NOP-1A. *J Nucl Med*. 2012;53:385-392.
11. Vandenberghe R, van Laere K, Ivanoiu A, et al. 18F-flutemetamol amyloid imaging in Alzheimer disease and mild cognitive impairment: A phase 2 trial. *Ann Neurol*. 2010;68:319-329.
12. Narendran R, Frankle WG, Mason NS, et al. Positron emission tomography imaging of D(2/3) agonist binding in healthy human subjects with the radiotracer [(11)C]-N-propyl-norapomorphine: preliminary evaluation and reproducibility studies. *Synapse*. 2009;63:574-584.
